# Supplementary material for: Consortium-Based Science: The NIEHS’s Multipronged, Collaborative Approach to Assessing the Health Effects of Bisphenol A
Source: PubMed Central journal article supplement (PMC3548284; doi:10.1289/ehp.1205330), 2012-09-25
Supplement: ehp.1205330.s001.pdf [file ehp.1205330.s001.pdf]

**Supplemental Material**

**Consortium-Based Science: The NIEHS's Multipronged, Collaborative Approach to Assessing the Health Effects of Bisphenol A**

**Linda S. Birnbaum, John R. Bucher, Gwen W. Collman, Darryl C. Zeldin, Anne F. Johnson, Thaddeus T. Schug, and Jerrold J. Heindel**

**Table of Contents**

**Figure S1. Chemical structures of bisphenol A (4,4'-(propane-2,2-diyl)diphenol) and estradiol (17B-estra-1,3,5(10)-triene-3,17-diol).....3**

**Table S1. Extramural NIEHS research investments aimed at filling research gaps and addressing sources of uncertainty regarding the health effects of BPA.....4**

**Table S2. BPA-focused Grand Opportunity grants supported by funding from the American Recovery and Reinvestment Act (ARRA).....6**

**Table S3. BPA research supported by CLARITY study.....7**

**Table S4. BPA-focused workshops organized by NIEHS.....8**

Figure S1. Chemical structures of bisphenol A (4,4'-(propane-2,2-diyl)diphenol) and estradiol (17 $\beta$ -estra-1,3,5(10)-triene-3,17-diol).

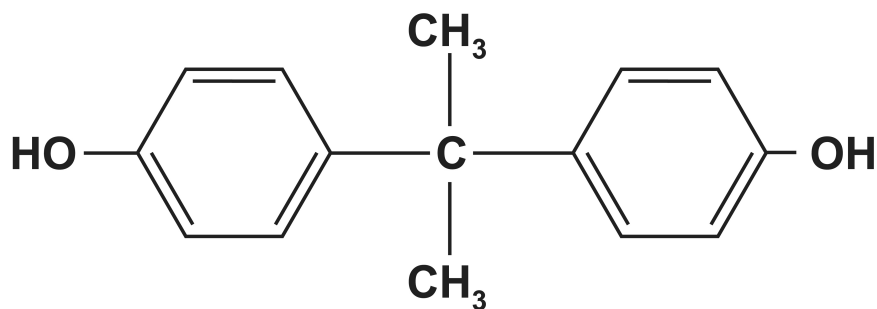

Bisphenol A

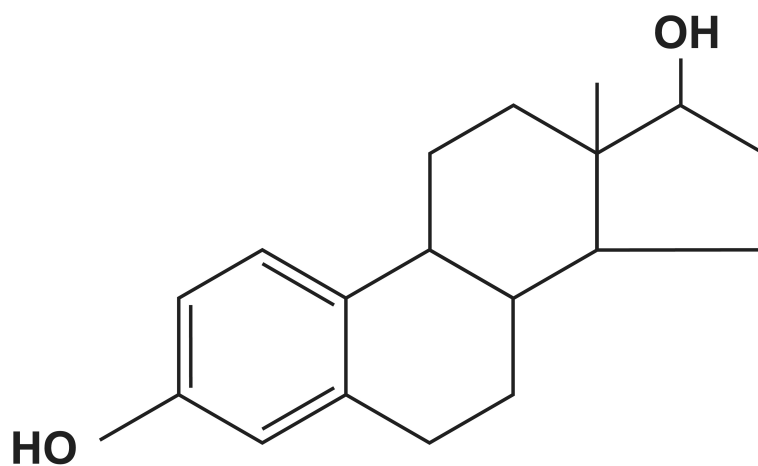

Estradiol

**Supplemental Material, Table S1. Extramural NIEHS research investments aimed at filling research gaps and addressing sources of uncertainty regarding the health effects of BPA.**

| <b>Research Challenge</b>                                                                               | <b>NIEHS Research Investments</b>                                                                                                                                              |
|---------------------------------------------------------------------------------------------------------|--------------------------------------------------------------------------------------------------------------------------------------------------------------------------------|
| Lack of consistency in models, approaches, routes of exposure, doses, and endpoints.                    | Developed consortium to establish standard approaches and share technologies, materials, tissues, and data.                                                                    |
| Persistent data gaps due to lack of communication among researchers.                                    | Held bimonthly working group teleconferences and yearly grantee meetings to share ideas and results.                                                                           |
| Difficulty extrapolating between animal and human studies.                                              | Facilitated communication among researchers studying humans and animal models to establish consistent doses and endpoints across species.                                      |
| Questions about accuracy and reliability of measurements of BPA levels in humans (biomonitoring).       | Conducted round robin experiments to refine research protocols and eliminate errors; synthesized BPA standards and established internal standards for use in BPA measurements. |
| Gaps in understanding of routes of human exposure and links between route of exposure and effects.      | Requested grantees assess multiple routes of exposure and measure blood levels of BPA to relate to exposure and effects.                                                       |
| Inconsistent or lacking information on certain disease endpoints.                                       | Requested that several grantees assess the same disease endpoints using different approaches and models to validate data across laboratories and models.                       |
| Lack of overlapping endpoints among studies.                                                            | Requested that grantees add additional endpoints to studies to provide data on endpoints across laboratories.                                                                  |
| Lack of mechanistic studies.                                                                            | Requested that grantees focus on understanding not only BPA effects but also underlying mechanisms.                                                                            |
| Lack of dose response data; lack of understanding of low dose effects and non-monotonic dose responses. | All grantees were asked to assess dose responses, not just single doses of BPA, and to include doses in the $\mu\text{g}$ and $\text{ng/kg}$ range.                            |
| Lack of understanding of gender differences in BPA effects.                                             | Grantees were asked to assess both sexes.                                                                                                                                      |
| Lack of understanding of pharmacokinetics across lifespan and species.                                  | Grantees, the pharmacokinetic study, the cashiers study, and the occupational study will assess BPA levels in humans across time and will enable comparisons across species.   |
| Discrepancies between investigator-initiated research results and GLP-compliant studies.                | CLARITY study will include five doses of BPA, two doses of ethinyl estradiol, and 12 endpoints assessed by academic researchers.                                               |

**Supplemental Material, Table S1 (cont.)**

| <b>Research Challenge</b>                                                  | <b>NIEHS Research Investments</b>                                                                                                                                                                                                       |
|----------------------------------------------------------------------------|-----------------------------------------------------------------------------------------------------------------------------------------------------------------------------------------------------------------------------------------|
| Lack of comprehensive assessment of current state of the science.          | Consortium working groups are preparing reviews of the literature. Reviews on low dose effects, pharmacokinetics, reproduction, neurobehavior, biomonitoring, and cancer are being developed along with an overall consensus statement. |
| Questions about the purity and standardization of BPA used in experiments. | NTP provided characterized BPA for use by all grantees and also BPA standard for use in BPA assays.                                                                                                                                     |
| Lack of coordination of all NIEHS activities.                              | Trans-NIEHS BPA Working Group established to coordinate activities and share results.                                                                                                                                                   |

**Supplemental Material, Table S2. BPA-focused Grand Opportunity grants supported by funding from the American Recovery and Reinvestment Act (ARRA).**

| <b>Area of Focus</b>              | <b>Principal Investigator</b>                         | <b>Institution</b>                                                                                    |
|-----------------------------------|-------------------------------------------------------|-------------------------------------------------------------------------------------------------------|
| Mammary cancer                    | Ana Soto                                              | Tufts University                                                                                      |
| Prostate cancer                   | Gail S. Prins, Shuk-Mei Ho, and Kevin P. White        | University of Illinois at Chicago;<br>University of Cincinnati; University of Chicago                 |
| Prostate cancer                   | Cheryl L. Walker, Shuk-Mei Ho, and Michael A. Mancini | University of Texas M.D. Anderson Cancer Center; University of Cincinnati; Baylor College of Medicine |
| Prostate disease                  | Frederick vom Saal and William Allen Ricke            | University of Missouri, Columbia; University of Rochester School of Medicine and Dentistry            |
| Metabolism                        | Beverly Sharon Rubin and Andrew S. Greenberg          | Tufts University                                                                                      |
| Cardiac function                  | Scott M. Belcher                                      | University of Cincinnati                                                                              |
| Children's growth and development | Kim Harley and Brenda Eskenazi                        | University of California, Berkeley                                                                    |
| Neurodevelopment and behavior     | Shanna H. Swan and Bernard Weiss                      | University of Rochester                                                                               |
| Immune system effects             | Robin Marjorie Whyatt                                 | Columbia University Health Sciences                                                                   |
| Immune system effects             | B. Paige Lawrence                                     | University of Rochester                                                                               |

**Supplemental Material, Table S3. BPA research supported by CLARITY study.**

| <b>Area of Focus</b>                  | <b>Principal Investigator</b> | <b>Institution</b>                                                      |
|---------------------------------------|-------------------------------|-------------------------------------------------------------------------|
| Development of male urogenital system | Frederick vom Saal            | University of Missouri                                                  |
| Male reproduction                     | Kim Boekelheide               | Brown University                                                        |
| Male reproduction/sexual function     | Nestor Gonzalez-Cadavid       | Los Angeles Biomedical Research Institute at Harbor-UCLA Medical Center |
| Female reproduction                   | Jodi Flaws                    | University of Illinois at Urbana-Champaign                              |
| Uterine cancer                        | Shuk-Mei Ho                   | University of Cincinnati                                                |
| Prostate cancer                       | Gail Prins                    | University of Illinois at Chicago                                       |
| Mammary cancer                        | Ana Soto                      | Tufts University                                                        |
| Metabolism and obesity                | Nira Ben-Jonathan             | University of Cincinnati                                                |
| Metabolism and diabetes               | Andrew Greenberg              | Tufts University                                                        |
| Neurobehavior                         | Heather Patisaul              | North Carolina State University                                         |
| Brain and thyroid function            | Robert Zoeller                | University of Massachusetts, Amherst                                    |
| Immune function                       | Norbert Kaminski              | Michigan State University                                               |

**Supplemental Material, Table S4. BPA-focused workshops organized by NIEHS.**

| <b>Description</b>                                                                                                                                                                                                       | <b>Date</b>                                                     | <b>Location</b>            |
|--------------------------------------------------------------------------------------------------------------------------------------------------------------------------------------------------------------------------|-----------------------------------------------------------------|----------------------------|
| “Bisphenol A: An Examination of the Relevance of Ecological, In vitro and Laboratory Animal Studies for Assessing Risks to Human Health” (workshop that led to the publication of the “Chapel Hill consensus statement”) | November 28-30, 2006                                            | Chapel Hill, NC            |
| Public meetings held by the NTP-CERHR Bisphenol A Expert Panel                                                                                                                                                           | March 5-7, 2007<br>August 6-8, 2007                             | Alexandria, VA             |
| BPA Grantee Consortium workshops                                                                                                                                                                                         | October 6, 2009<br>September 21-22, 2010<br>January 17-19, 2012 | Research Triangle Park, NC |
| CLARITY-BPA workshop                                                                                                                                                                                                     | February 29- March 1, 2012                                      | Little Rock, AK            |
